# Supplementary material for: TBX2 Identified as a Potential Predictor of Bone Metastasis in Lung Adenocarcinoma via Integrated Bioinformatics Analyses and Verification of Functional Assay
Source: PubMed Central journal article supplement (PMC6930436; doi:10.7150/jca.31636), 2020-01-01
Supplement: jcav11p0388s1.pdf [file jcav11p0388s1.pdf]

# Supplementary

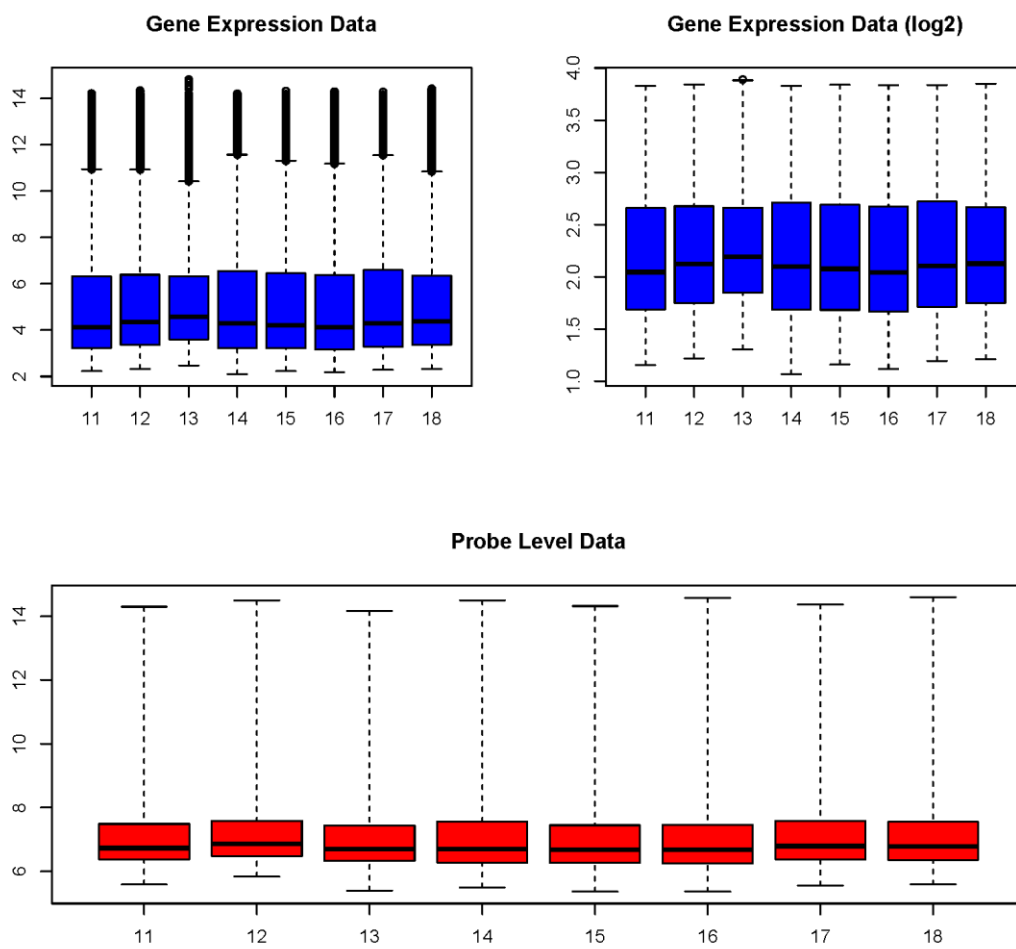

Figure S1

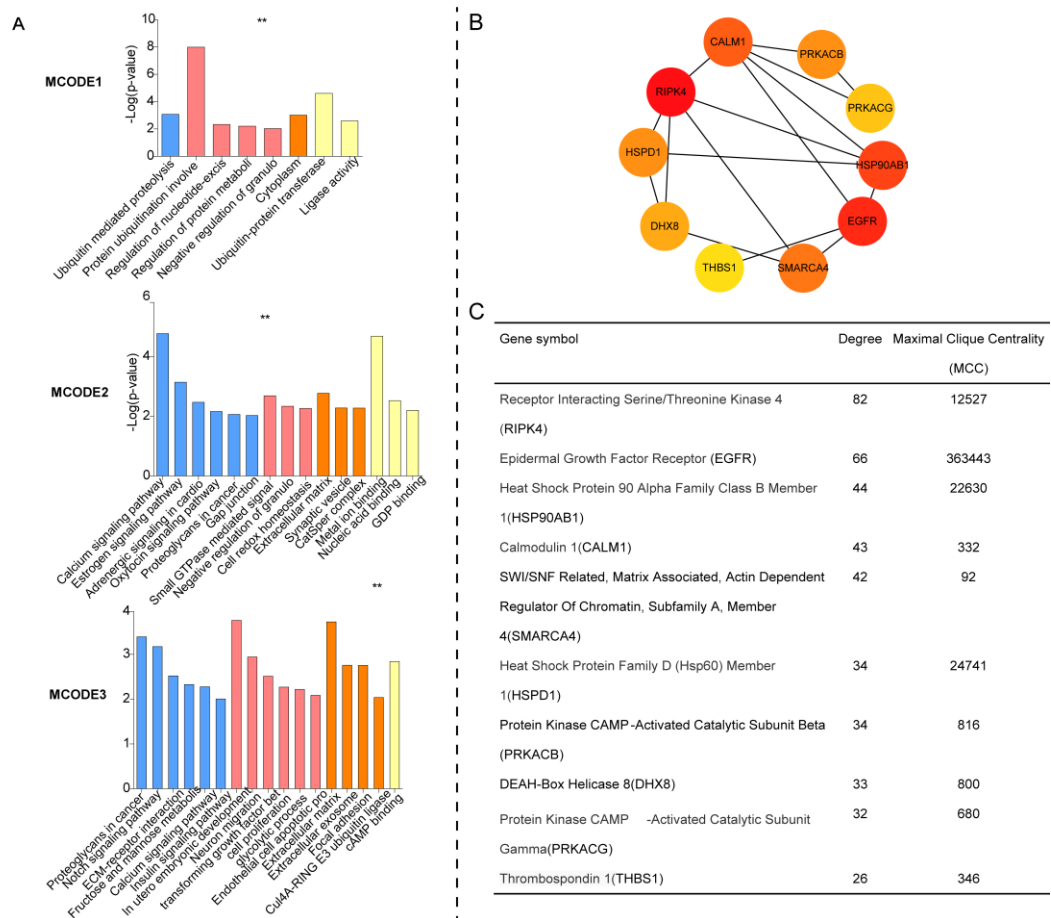

Figure S2

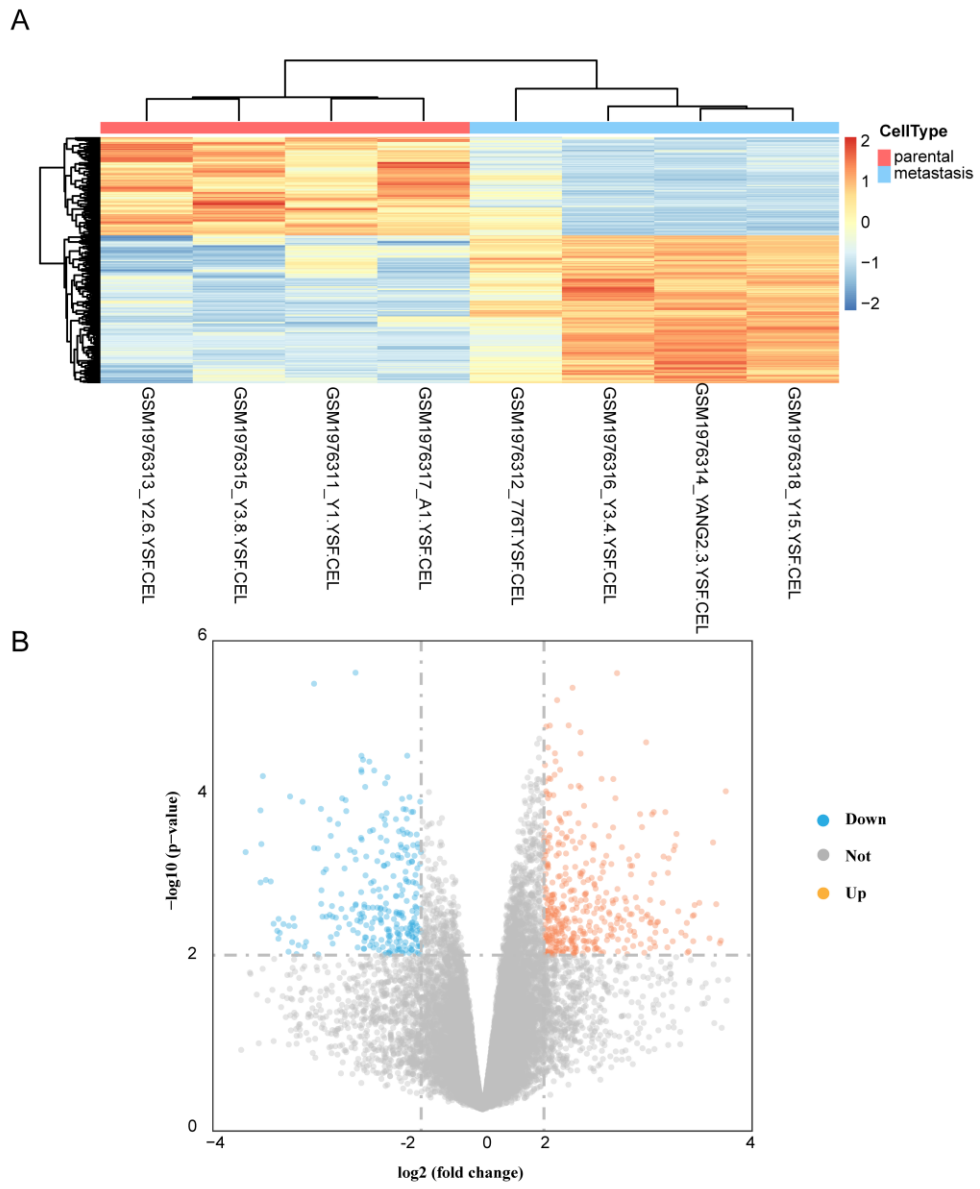

Figure S3

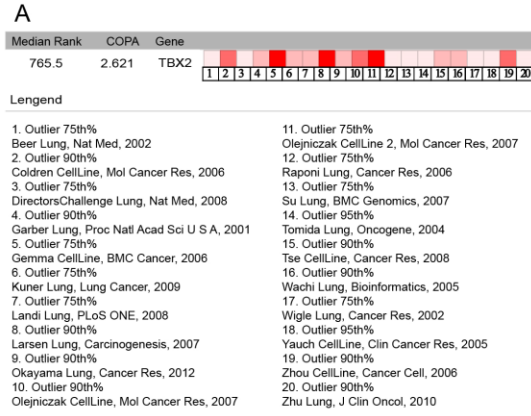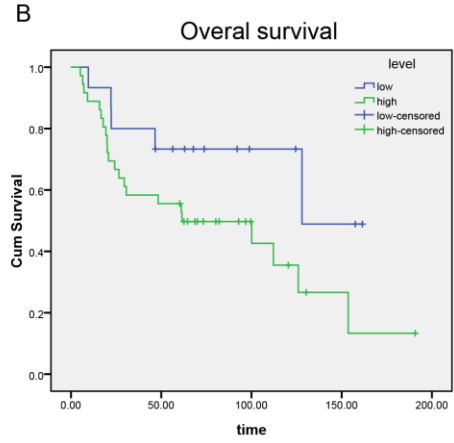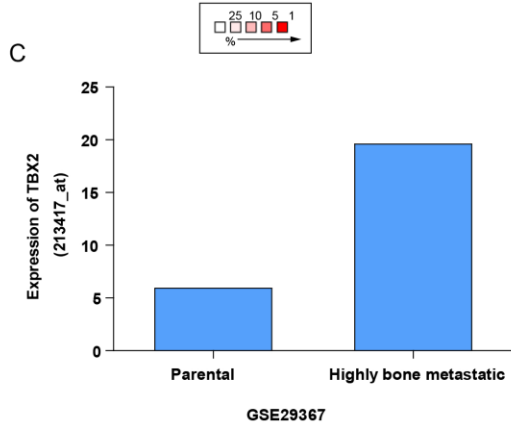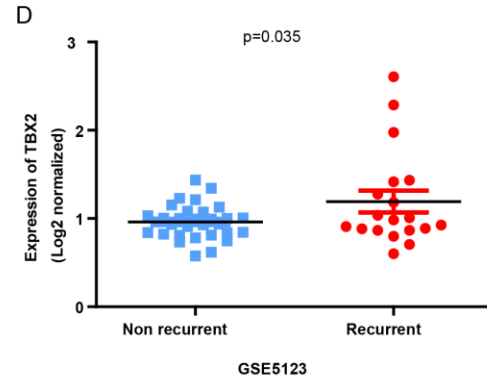

Figure S4

A

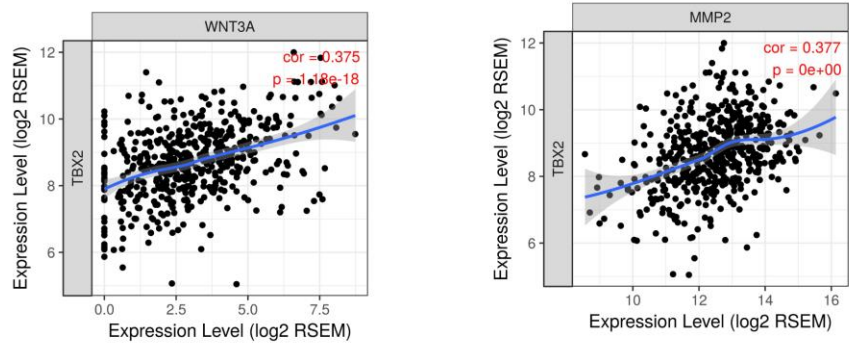

B

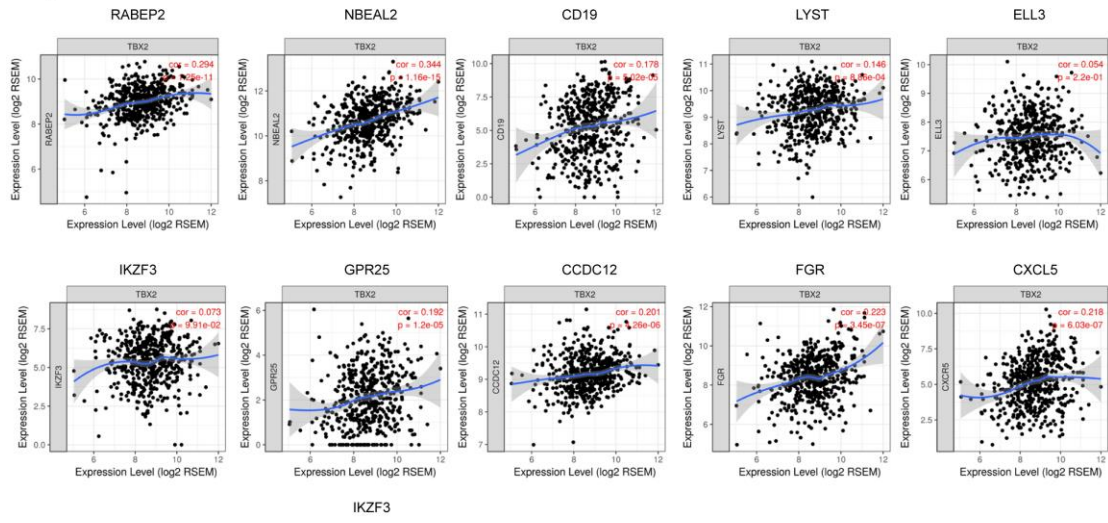

Figure S5
